# Supplementary material for: Autoencoder-based feature extraction for the automatic detection of snow avalanches in seismic data
Source: Copernicus journal article supplement (doi:10.5194/gmd-2024-76), 2024-05-27
Supplement: Supplementary file [file gmd-2024-76-AC3-supplement.pdf]

The paper is dealing with snow avalanche detection using autoencoded seismic data. It uses one study site in Davos and events were picked and the performance tested. The article is well written and of interest for publication. However, the following should be addressed.

Discuss the effects of various avalanche types in relation to models and autoencoders. Explain how the findings can be applied to other study sites and what the specific considerations are in this context. That could be also highlighted in the comparison with the former studies.

The effect of different avalanche types on the performance indeed is not analysed in this study, since no information on avalanche type or size was available. The primary goal of this study was to develop a model for all occurring avalanches regardless of their type or size. Therefore, we carefully selected the train and test set to include both wet as well as dry avalanches. A closer examination of different avalanche types will certainly be the subject of future studies with more information available and larger avalanche catalogues. Nevertheless, to explore the impact of different avalanche types on the detection performance, we divided the test set into mid-winter dry-snow conditions, 6<sup>th</sup> of Feb to 15<sup>th</sup> of April, and late-winter wet-snow conditions, 15<sup>th</sup> of Apr to 17<sup>th</sup> of May. In the following figure, we plotted the results in the form of confusion matrices for the spectral autoencoder feature classification in both periods. The results show that wet-snow avalanches were detected slightly better than dry-snow avalanches at the Davos test site for this test set. However, the model appears to produce more false alarms in the late winter season, which might be due to rising environmental noise, the reduction of the snow cover and its attenuation and the rise of a nearby stream. As the treatment of different avalanche types was not in the scope of this study, we will not include this test in the final version.

6<sup>th</sup> of February to 15<sup>th</sup> of April

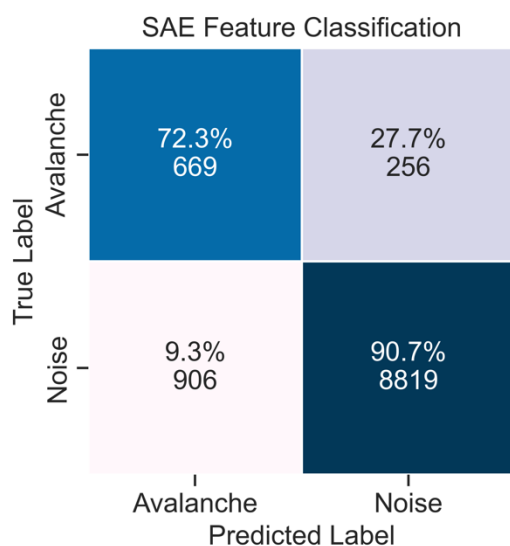

15<sup>th</sup> of April to 17<sup>th</sup> of May

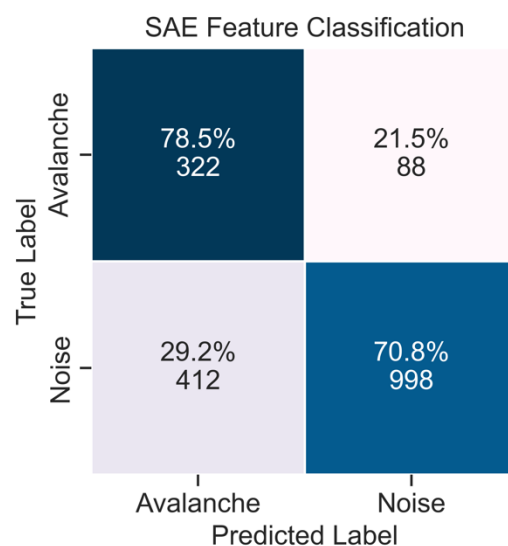

Since the models have not been tested with data from other sites, their transferability to different locations remains speculative. Seismic signals generated by avalanches exhibit common patterns, as demonstrated by earlier studies conducted in various countries such as Switzerland (Suriñach et al., 2001; van Herwijnen et al., 2011), Norway (Vilajosana et al., 2007), France (Lacroix et al., 2012), and Japan (Pérez-Guillén et al., 2019). However, the generation of seismic energy depends not only on the characteristics of the source (such as avalanche size and type) but also on site-specific factors (such as seismic site effects due to topography and geological characteristics) and the source-receiver distance, which affects the geometrical and anelastic attenuation of the waves (based on the sensor configuration relative to the avalanche path and terrain characteristics). Therefore, proper validation of the model performance using input data from different locations is necessary to assess their transferability to other test sites. We expect variation in the performance arising from different configurations in the study site setup, sensor location and configuration as well as in the characteristics of the terrain and the avalanches. Nonetheless, we see the importance of developing models that can be used in different locations and will certainly consider it in future studies.

Also, we will state this in the revised manuscript.

*The conclusions and the further use should be more clear.  
Please, avoid repetitions throughout the article.*

Thank you very much, we will consider these suggestions in the final and revised manuscript.

#### *References:*

Lacroix, P., Grasso, J.-R., Roulle, J., Giraud, G., Goetz, D., Morin, S., and Helmstetter, a. (2012). Monitoring of snow avalanches using a seismic array: Location, speed estimation, and relationships to meteorological variables. *Journal of Geophysical Research*, 117(F1):F01034.

Pérez-Guillén, C., Tsunematsu, K., Nishimura, K. and Issler, D., 2019. Seismic location and tracking of snow avalanches and slush flows on Mt. Fuji, Japan. *Earth Surface Dynamics*, 7(4), pp.989-1007.

Suriñach, E., Furdada, G., Sabot, F., Biescas, B., and Vilaplana, J. (2001). On the characterization of seismic signals generated by snow avalanches for monitoring purposes. *Annals of Glaciology*, 32(1):268–274.

van Herwijnen, A. and Schweizer, J. (2011). Monitoring avalanche activity using a seismic sensor. *Cold Regions Science and Technology*, 69(2-3):165–176.

Vilajosana, I., Suriñach, E., Khazaradze, G., and Gauer, P. (2007). Snow avalanche energy estimation from seismic signal analysis. *Cold Regions Science and Technology*, 50(1-3):72–85.
